1 **Title: Omicron breakthrough infections in vaccinated or previously**  
2 **infected hamsters**

3 **Authors:** Jie Zhou<sup>1 †</sup>, Ksenia Sukhova<sup>1 †</sup>, Paul F. McKay<sup>1</sup>, Ashwini Kurshan<sup>2</sup>, Yeuk Yau<sup>2</sup>,  
4 Thomas Lechmere<sup>2</sup>, Jonathan C. Brown<sup>1</sup>, Maya Moshe<sup>1</sup>, Ruthiran Kugasathan<sup>1</sup>, Luke B.  
5 Snell<sup>3</sup>, Jonathan D. Edgeworth<sup>3</sup>, Robin J. Shattock<sup>1</sup>, Katie J. Doores<sup>2</sup>, Thomas P. Peacock<sup>1</sup>,  
6 Wendy S. Barclay<sup>1\*</sup>

7 **Affiliations:**

8 <sup>1</sup>Department of Infectious Disease, Imperial College London; London, UK.

9 <sup>2</sup>Department of Infectious Diseases, School of Immunology & Microbial Sciences, King's  
10 College London; London, UK.

11 <sup>3</sup>Centre for Clinical Infection and Diagnostics Research, Department of Infectious Diseases,  
12 Guy's and St Thomas' NHS Foundation Trust; London, UK.

13 \*Corresponding author: [w.barclay@imperial.ac.uk](mailto:w.barclay@imperial.ac.uk)

14 †These authors contributed equally to this work

15 **One Sentence Summary:** Infection with the Delta and Omicron SARS-CoV-2 variants do  
16 not provide cross-protective immunity against reinfection with one another in hamsters.

17

## 18 **Abstract**

19           The second and third years of the SARS-CoV-2 pandemic have been marked by the  
20 repeated emergence and replacement of ‘variants’ with genetic and phenotypic distance from  
21 the ancestral strains, the most recent examples being Delta and Omicron. Here we describe a  
22 hamster contact exposure challenge model to assess protection conferred by vaccination or  
23 prior infection against re-infection. We found that 2-doses of self-amplifying RNA vaccine  
24 based on the ancestral spike ameliorated weight loss following Delta infection and decreased  
25 viral loads, but had minimal effect on Omicron/BA.1 infection. Prior infection with ancestral  
26 or Alpha variant was partially protective against Omicron/BA.1 infection, whereas all  
27 animals previously infected with Delta and exposed to Omicron became infected, although  
28 shed less virus. We further tested whether prior infection with Omicron/BA.1 protected from  
29 re-infection with Delta or Omicron/BA.2. Omicron/BA.1 was protective against  
30 Omicron/BA.2, but not Delta reinfection, again showing Delta and Omicron have a very large  
31 antigenic distance. Indeed, cross-neutralisation assays with human antisera from otherwise  
32 immunonaïve individuals (unvaccinated and no known prior infection), confirmed a large  
33 antigenic distance between Delta and Omicron. Prior vaccination followed by Omicron or  
34 Delta breakthrough infection led to a higher degree of cross-reactivity to all tested variants.  
35 To conclude, cohorts whose only immune experience of COVID is Omicron/BA.1 infection  
36 may be particularly vulnerable to future circulation of Delta or Delta-like derivatives. In  
37 contrast, repeated exposure to antigenically distinct spikes, via infection and or vaccination  
38 drives a more cross-reactive immune response, both in hamsters and people.

39

40 **MAIN TEXT**

41 **INTRODUCTION**

42           Omicron is the most recent SARS-CoV-2 Variant of Concern. Following its timely  
43 description by multiple laboratories in Africa (1), it spread rapidly displacing the previously  
44 circulating Delta variant around the world. At least 5 distinct lineages of Omicron have been  
45 described including BA.1 and BA.2 which circulated widely early in 2022, followed in recent  
46 months by BA.4 and BA.5 (2). All Omicron variants carry an unprecedented number of  
47 mutations in their genome including over 30 coding changes in the Spike gene alone. This  
48 results in a considerable antigenic distance between Omicron Spike and that of other previous  
49 variants, especially Delta (3). Thus, it is not unexpected that antibodies induced after  
50 vaccination with COVID vaccines, that are based on the Spike of the early Wuhan-hu-1  
51 strain, poorly neutralize the Omicron variant (4-13). The lack of cross-neutralization between  
52 Omicron and earlier variants likely accounts for the observed high transmission of Omicron  
53 in populations that are heavily vaccinated and/or have a high rate of previous infection (14,  
54 15).

55           Here we use a hamster model of SARS-CoV-2 transmission to illustrate Omicron  
56 vaccine breakthrough and also a high rate of reinfection by Omicron in animals previously  
57 infected with Delta variant. The levels of Omicron virus shedding from vaccinated or  
58 previously Delta-infected were compatible with the potential for onwards airborne  
59 transmission. We also find that hamsters previously infected with Omicron/BA.1 (BA.1)  
60 were not protected against infection with Delta virus but did not become virus positive after  
61 exposure to an Omicron/BA.2 (BA.2) isolate. Our *in vivo* findings are paralleled by  
62 neutralisation assays with human sera collected from individuals who have recovered  
63 following infection with earlier SARS-CoV-2 variants that demonstrate a lack of cross-

64 neutralization between Omicron and Delta. These studies offer an important contribution to  
65 risk assessing the potential for variants to escape vaccine control, and to reinfect previously  
66 infected individuals. Taken together the results reinforce that there may be specific cohorts  
67 who are especially vulnerable to antigenically distant new variants, for example children who  
68 have been less vaccinated than adults. Moreover, our findings imply that if we aspire to use  
69 vaccines to control circulation of SARS-CoV-2 variants, we will need a system for rapidly  
70 updating the immunogen based on detailed antigenic characterization validated with  
71 preclinical models.

72

## 73 **RESULTS**

### 74 **Omicron/BA.1 variant is efficiently transmitted to hamsters vaccinated with a Wuhan-** 75 **hu-1 Spike saRNA vaccine**

76 We previously showed that immunization with a self-amplifying RNA vaccine  
77 encoding the Wuhan-hu-1 SARS-CoV-2 Spike gene (saRNA-Spike) protected hamsters  
78 against weight loss following infection through exposure to cage mates infected with either a  
79 first wave isolate or an Alpha variant isolate (16, 17). Although all exposed immunized  
80 hamsters in that study still became virus positive, weight loss and virus shedding were  
81 significantly reduced compared to that in a control group vaccinated with an irrelevant  
82 immunogen (17).

83 Here we used the same protocol to test the efficacy of the saRNA-Spike vaccine  
84 against Delta and BA.1 variants. Groups of 16 hamsters were immunized with either saRNA-  
85 Spike or a control vaccine encoding HIV gp120 (saRNA-HIV). The immunization regimen  
86 consisted of an initial priming dose, followed by a boosting dose 4 weeks later (Fig. 1A).  
87 Two weeks post-boost, serum samples were collected before challenge by the direct contact  
88 exposure route. Pseudovirus neutralization assays confirmed that animals vaccinated with  
89 saRNA-Spike had high serum neutralizing titres against WT/D614G ( $ND_{50} = 678$ , geometric  
90 mean), and showed 2-fold decrease ( $p > 0.05$ ) and 13-fold ( $p = 0.0002$ ) decrease in  
91 neutralizing activity against Delta and BA.1 variants respectively (Fig. 1B).

92 Donor hamsters were all productively infected intranasally with 100 PFU of either  
93 Delta or BA.1 variant and shed infectious virus in their nasal wash from day 1 post-  
94 inoculation. Infectious viral loads in nasal wash were higher on day 1 and day 2 post  
95 infection in Delta infected donors than BA.1 infected animals and viral RNA levels were also  
96 higher in the nasal wash of Delta infected donors (Fig. 1C and fig. S1A). The Delta

97 inoculated donor hamsters lost approximately 10% starting body weight by day 5 post-  
98 infection after which they recovered, while the BA.1 inoculated donor hamsters did not lose  
99 weight (Fig. 1F).

100 Vaccinated hamsters were co-housed with an infected donor 1 day after inoculation.  
101 Each cage housed one donor, one saRNA-spike vaccinee and one control saRNA-HIV  
102 vaccinee animal (Fig. 1A). Analysis of infectious virus and E gene in nasal washes collected  
103 daily revealed that all sentinel hamsters became infected (Fig. 1D, E and fig. S1B, C).  
104 However, the infectious viral load and viral RNA copies shed in nasal wash of saRNA-Spike  
105 vaccinated hamsters infected with Delta variant was significantly lower than in the control  
106 group on every day that virus was detected and in total (area under the curve) (Fig. 1D and  
107 fig. S2B). In contrast, infectious viral load in nasal washes of animals infected with Omicron  
108 virus was minimally affected by vaccination and was only lower than in control animals on  
109 day 5 (Fig 1E and fig. S2C). Sentinels infected by Delta variant lost less weight than the  
110 directly infected donor animals regardless of vaccine status; weight loss peaked at around  
111 4.5% in the control group and at 3.2% in the saRNA-Spike vaccine recipients vs 10% in the  
112 naïve donors. This likely results from a lower dose initiating infection through the contact  
113 exposure route than for the directly inoculated animals. None of the sentinel animals exposed  
114 to BA.1 variant in any vaccinated group lost weight (Fig. 1G, H).

115 We performed pseudovirus neutralization assays with sera collected on day 14 post-  
116 infection of vaccinated animals. Neutralizing titres against WT, Delta, BA.1 and BA.2 all  
117 increased following breakthrough infection (Fig. 1I). The post-vaccine breakthrough  
118 infection sera from the saRNA-Spike vaccinated hamsters infected by BA.1 showed slightly  
119 lower neutralizing titres (2.1 and 2.6 fold) against BA.1 and BA.2 than the WT and Delta  
120 variants. The post-infection sera from the saRNA-Spike vaccinated hamsters infected with  
121 Delta had the lowest neutralizing titres against BA.1, compared to against WT, Delta and

122 BA.2, (6.7-fold lower than against WT) suggesting that vaccine breakthrough with Delta  
123 might lead to a greater cross-reactive neutralising response against BA.2, than BA.1.

124 Thus, the reduction in neutralizing activity induced against BA.1 led to a failure of the  
125 vaccine based on first wave Spike sequence to reduce both infection and viral load.

### 126 **Reinfection of hamsters infected with earlier variants following exposure to Omicron.**

127 We next tested whether BA.1 would also escape prior immunity conferred in animals  
128 that were previously infected with earlier variants (Fig. 2A). Groups of 4 hamsters were  
129 infected via intranasal inoculation with 100 PFU of an early first wave wildtype isolate  
130 (WT/D614G), an Alpha variant isolate, a Delta variant isolate, or were mock infected. All  
131 infected animals robustly shed virus in the nasal washes (fig. S3B-G). Six weeks after being  
132 infected, serum samples were collected from the recovered animals to test for the presence of  
133 neutralizing antibodies. We detected robust neutralizing titres against the homologous Spike  
134 within all groups although due to limited serum volumes available we were not able to  
135 establish end point titres for all animals. Titres against BA.1 variant fell below the limit of  
136 detected in all these earlier variant sera (Fig. 2B-D). The previously infected or naïve  
137 hamsters were then co-housed with donor hamsters infected by intranasal inoculation with  
138 100 PFU of BA.1, from day 1 post-infection of the donor. All animals were nasal washed  
139 daily. All 4 naïve sentinel animals acquired BA.1 infection from the co-housed donors and  
140 shed high levels of BA.1 in their nasal wash (Fig. 2E and fig. S3A). In contrast, only 1 of 4  
141 animals previously infected with first wave virus (WT/D614G) or Alpha variant shed  
142 infectious virus in nasal wash after exposure to BA.1-infected donors (Fig. 2F, G and fig.  
143 S3H, I). Conversely, no protection against BA.1 infection was observed following prior  
144 infection with Delta variant; all 4 animals in that group shed high viral RNA loads and high  
145 titres of detectible live virus for several days post-exposure (Fig. 2H and fig. S3J). None of

146 the animals lost weight following the reinfection with BA.1 variant regardless of previous  
147 SARS-CoV-2 infections, including the previously mock infected ones (fig. S4).

148 We also tested the potential of the reinfected animals for onwards transmission by  
149 measuring infectious virus exhaled through airborne droplets emitted by the infected animals  
150 (fig. S5). At day 2 following the exposure to the infected donor animals, the 4 naïve sentinels  
151 and the 4 previous Delta infected hamsters were placed in a chamber from which air was  
152 passed over the surface of susceptible cultured cells. Following 10 minutes of exposure, the  
153 cells were removed and an overlay applied before 3 day incubation in order to observe  
154 plaques formed by infectious virus deposited on the cells. Cell culture plates were placed at 3  
155 different distances, 30 cm, 60 cm or 90 cm from the infected animal. All 8 infected hamsters  
156 emitted virus into the air,, and overall plaque counts were not significantly different when  
157 comparing those from the naïve sentinels and ones from the animals previously infected with  
158 Delta variant ( $p = 0.11$ ) (Fig. 2I). The detection of infectious virus in the nasal washes and in  
159 the air emitted from the previously infected animals suggest their potential to support onward  
160 chain of transmission despite having prior immunity against SARS-CoV-2.

161 **Reinfection of hamsters previously infected by Omicron/BA.1 with Delta variant, but**  
162 **not Omicron/BA.2.**

163 Due to the low protection conferred by prior infection with Delta variant against BA.1  
164 re-infection, and the fact that both Omicron and Delta variants continue to co-circulate in  
165 some parts of the world (albeit now at low levels), we next tested the reciprocal relationship  
166 by challenging hamsters previously infected with BA.1 by exposure to the Delta variant. As  
167 before, the BA.1 infected hamsters were allowed to recover and convalesce for 6 weeks  
168 following the initial infection. Donor animals were infected via intranasal inoculation with  
169 100 PFU of either Delta variant or the second Omicron lineage, BA.2. Sera collected from the



170 previously infected animals at 6 weeks post-infection showed high neutralizing titres against  
171 BA.1, two sentinels showed relatively high neutralizing titres against BA.2 Spike, the rest  
172 had low or non-detectable titres against BA.2 or Delta Spike (Fig. 3A). Donor hamsters  
173 infected with Delta variant lost weight as seen previously while donors infected with BA.2  
174 did not lose weight, similar to the BA.1-infected donors described previously (Fig. 3B). The  
175 viral load in nasal washes of BA.2 infected hamsters was lower than that of Delta infected  
176 donors (Fig. 3C-E and fig. S6A-C). All 4 Delta-exposed animals were reinfected and shed  
177 robust viral E gene loads and infectious virus in nasal washes (Fig. 3E and fig. S6C). 3 of the  
178 4 Naïve age-matched sentinel hamsters exposed to the BA.2 donors were infected, and virus  
179 shedding became detectable in their nasal wash samples with a one day delay comparing to  
180 the kinetics of transmission measured for BA.1 (see Fig. 2E) (Fig. 3C and fig. S6A).  
181 However, only one of the 4 animals previously infected with BA.1 was reinfected by BA.2  
182 (Fig. 3D and fig. S6B), and titres of infectious virus were low and transient, only evident at 3  
183 dpi. None of the reinfected animals showed weight loss (fig. S7). We also monitored the  
184 potential of the animals reinfected with Delta after BA.1 to support onwards airborne  
185 transmission. Infectious virus was detected from droplets emitted into the air by these  
186 hamsters on day 2 post exposure to the donors (Fig. 3F). Following the exposure to BA.2,  
187 neither the directly inoculated donors, nor previously naïve sentinels, nor sentinels previously  
188 exposed to BA.1 shed detectible infectious virus particles into the air. Overall, this shows that  
189 prior BA.1 infection is partially protective against reinfection with BA.2, but not Delta  
190 variant.

### 191 **Human convalescent sera**

192 To relate the result obtained from the *in vivo* challenge experiments to the measurable  
193 antibody responses in humans, we collected and tested the neutralisation activity of antisera  
194 from hospitalised individuals taken during the first UK SARS-CoV-2 wave (N=9), the Alpha

195 wave (N=9), the Delta wave (N=12) and the BA.1 wave (N=16) (Fig. 4). Where possible we  
196 chose sera from previously naïve, unvaccinated individuals whose only known exposure was  
197 to the named variant. Sera was collected 13-24 days post onset of symptoms. All infected  
198 individuals produced a robust neutralizing response against the strain they were initially  
199 infected with. Cross-neutralization of other variants was observed but always at reduced titres  
200 compared to homologous virus. In sera from first wave, Alpha or Delta infected individuals,  
201 the greatest reduction was observed against BA.1. The loss of titre against BA.1 following  
202 Delta infection was profound, with a 120-fold reduction in the GMT, compared to the 60-fold  
203 reduction in sera from Alpha infected individuals. Sera from individuals infected with WT  
204 D614G first wave virus showed a 128.5 fold reduction in ability to neutralize BA.1. In sera  
205 from BA.1 infected individuals, a 23-fold reduction and a 15-fold reduction in GMT against  
206 Delta and BA.2 respectively were determined in comparison to that against BA.1. These data  
207 highlight greater antigenic distance between Omicron and previous variants of concern and  
208 also a considerable antigenic distance between BA.1 and BA.2 in otherwise naïve  
209 individuals.

210 We also measured neutralizing antibody titres in individuals who experienced SARS-  
211 CoV-2 infection following 2 prior vaccine doses. These vaccine breakthrough infections  
212 yielded antibody titres higher than after vaccination alone, and appeared broader. The drop in  
213 antibody titre against BA.1 following Delta infection in vaccinated individuals was only 3.5-  
214 fold compared to homologous titres. Interestingly, following vaccine breakthrough infection  
215 with BA.1, the largest fold reduction from homologous titres for the two samples was against  
216 BA.2, of 6.6-fold.

217

218 **DISCUSSION**

219           As SARS-CoV-2 continues to spread at high rates in the human population, the virus  
220 is constantly evolving, with new variants periodically emerging. When an older variant is  
221 replaced by a new variant, it is vital to understand 1) whether the new variant has a fitness  
222 advantage over the old variant; 2) whether the new variant is more transmissible; 3) whether  
223 the vaccine's protection against the new variant decreases 4) whether immunity acquired from  
224 prior infections decreases against the new variant. Answering these questions helps us further  
225 understand the risk of new variants spreading in a population with ever increasing immunity  
226 to SARS-CoV-2. In this study, we used the hamster model to demonstrate that saRNA  
227 vaccine encoding Wuhan-hu-1 Spike protein confers significantly reduced neutralising ability  
228 against the BA.1 variant (Table 1). Moreover, hamsters previously infected with pre-Omicron  
229 variants can be re-infected with Omicron (Table 1) which can be exhaled as infectious virus  
230 into the air. These results explain, at least in part, the extremely rapid replacement of the  
231 Delta variant by Omicron.

232

**Table 1. Omicron breakthrough infections in previously vaccinated or infected hamsters**

| <b>saRNA Vaccine</b>    | <b>Re-challenge virus</b> | <b>Infection confirmed by plaque assay</b> | <b>Area under the Curve</b> | <b>Note</b>                        |
|-------------------------|---------------------------|--------------------------------------------|-----------------------------|------------------------------------|
| saRNA-Spike             | Delta                     | 4/4 (100%)                                 | 15.5                        | Median of (16.5, 12.4, 15.1, 15.9) |
| saRNA-HIV               | Delta                     | 4/4 (100%)                                 | 27.8                        | Median of (28.6, 28.5, 24.1, 27.2) |
| saRNA-Spike             | Omicron/BA.1              | 4/4 (100%)                                 | 14.3                        | Median of (19.8, 14.9, 12.9, 13.7) |
| saRNA-HIV               | Omicron/BA.1              | 4/4 (100%)                                 | 21.8                        | Median of (27.0, 27.1, 16.7, 14.7) |
| <b>Primary-infected</b> |                           |                                            |                             |                                    |
| N/A                     | Omicron/BA.1              | 4/4 (100%)                                 | 22.7                        | Median of (22.2, 23.1, 24.1, 21.2) |
| WT/D614G                | Omicron/BA.1              | 1/4 (25%)                                  | 5.8                         | Single value                       |
| Alpha                   | Omicron/BA.1              | 1/4 (25%)                                  | 5.9                         | Single value                       |
| Delta                   | Omicron/BA.1              | 4/4 (100%)                                 | 6.6                         | Median of (3.0, 11.2, 2.0, 10.3)   |
| N/A                     | Omicron/BA.2              | 3/4 (75%)                                  | 17.6                        | Median of (8.0, 17.6, 18.8)        |
| Omicron/BA.1            | Omicron/BA.2              | 1/4 (25%)                                  | 1.0                         | Single value                       |
| Omicron/BA.1            | Delta                     | 4/4 (100%)                                 | 16.20                       | Median of (14.9, 14.8, 17.6, 18.7) |

233

234

235           In our previous study, we showed that the saRNA-Spike vaccine confers protections  
236 against the WT/D614G and Alpha variants after two vaccine doses following the challenge of  
237 vaccinated hamsters via a direct contact route. In this study, fully saRNA vaccine-immunised  
238 hamsters had decreased virus titres and weight loss after co-housing with Delta inoculated  
239 donor hamsters. The saRNA vaccine introduced crossing neutralizing activity against the  
240 Delta variant, but the neutralising ability against BA.1 was significantly reduced. We did not  
241 observe a difference in virus shedding profiles or weight loss between the saRNA-vaccinated  
242 group and the control group, although other hamster experiments had also demonstrated that  
243 BA.1 did not cause any weight loss (18-20). Doremalen et al. also showed that upon  
244 vaccination with AZD1222 (ChAdOx1, a replication-deficient simian adenovirus-vectored  
245 vaccine encoding the Spike protein), antibody titres dropped significantly against the  
246 Omicron variant, and the AZD1222 vaccinated hamsters inoculated intranasally with BA.1  
247 had similar shedding on day 1 and day 2 compared to controls (21). This is consistent with  
248 the real-world survey, where breakthrough infections with Omicron are more likely to occur  
249 in people who are fully vaccinated, compared to the previous variants. In a Danish household  
250 study, fully vaccinated people experienced higher secondary attack rates in households with  
251 Omicron compared to Delta (14). Many groups have reported that the Omicron spike evades  
252 neutralization by antisera from convalescent patients or individuals vaccinated with two doses  
253 of mRNA vaccine (4-13). These data suggest that immune evasiveness is likely largely  
254 responsible for the rapid spread of the Omicron variant. We also showed that both Delta and  
255 Omicron breakthrough infection in double saRNA-Spike vaccinated hamsters generated  
256 potent and broad neutralizing activity against the current variants of concern, including  
257 Omicron BA.1 and BA.2, which is consistent with the data presented here and the report by  
258 Lechmere et al (22), suggesting that breakthrough SARS-CoV-2 infection can generate  
259 widely cross-reactive antibodies.

260 More and more people have experienced COVID-19 more than once since the  
261 beginning of the pandemic. Infection can induce strong protection against reinfection with  
262 Alpha, Beta and Delta variants (23-26). However, the effectiveness of previous infection in  
263 preventing reinfection was estimated to be 56.0% against the Omicron (27). Our findings  
264 suggest that previous infections with the WT/D614G, Alpha and Delta variants can confer  
265 cross-protection against the Omicron by reducing infection, virus peak titres, and virus  
266 shedding duration. Although our results are based on a small number of animals, the  
267 protection gained from previous Delta infection was worse against BA.1, when compared to  
268 the protection from previous infections with WT/D614G or Alpha. This is consistent with our  
269 and other serology studies based on a unique set of sera from convalescent patients infected  
270 with a range of variants (26). In an antigenic map created by Straten et al., the WT/D614G  
271 and Alpha variants group together. Infection by the WT/D614G and Alpha induced broader  
272 and stronger immunity compared to Delta. Understanding the antigenicity of SARS-CoV-2  
273 Spike is essential for risk assessment of re-infection as well as strain selection for COVID-19  
274 vaccine updates. In addition, we confirmed that previously Delta-infected sentinels reinfected  
275 with Omicron can exhale infectious virus into the air, and thus confer onward airborne  
276 transmission. Unlike the previous variants, Omicron infection generally causes less severe  
277 disease, and many reinfections are asymptomatic. (26, 28) Viral shedding from these infected  
278 and reinfected individuals that are asymptomatic (or mildly symptomatic) could pose a  
279 serious public health concern to the unvaccinated or immunocompromised populations. We  
280 conclude that high reinfection rates and potential airborne transmission of reinfected  
281 individuals contribute to the rapid spread of the Omicron variant.

282 At present every new SARS-CoV-2 variant has arisen from a pre-variant ancestor.  
283 However, it is hypothesized that future variants could arise from previous variants such as  
284 Alpha or Delta. Here we have shown that prior BA.1 infection provides very poor protection

285 against Delta reinfection (and vice versa). Therefore, although Delta cases are now at very  
286 low levels globally, Delta could potentially have an advantage in populations which have  
287 suffered high burdens of Omicron and have very low vaccine rates, such as young children.  
288 Furthermore, a future variant derived from Delta but which has evolved orthogonal  
289 antigenicity to both ancestral strains and Omicron, could have a large advantage in  
290 populations which have had both high vaccine rates and high levels of prior infections with  
291 Omicron.

292 The BA.2 lineage has been circulating in populations since the start of 2022, and  
293 currently BA.2 is estimated to account for over 95% cases in England (15). A few cases of  
294 sequence-confirmed reinfections with BA.2 following BA.1 have been detected (29, 30).  
295 Mykytyn et al suggested that Omicron BA.1 and BA.2 have evolved as two distinct antigenic  
296 outliers (31). We therefore assessed the effectiveness of BA.1 infection against reinfection  
297 with BA.2 using the hamster direct contact challenge model. Unlike other variants, BA.2  
298 replicated to lower titres in directly inoculated naïve hamsters, and did not transmit efficiently  
299 via direct contact route. Antisera collected from the BA.1 infected hamsters showed a  
300 significant reduced neutralising activity against the BA.2, as well as Delta. In contrast to  
301 100% reinfection in the Omicron sentinels exposed to the Delta donors, only one BA.1  
302 sentinel hamster was reinfected with BA.2 and transiently shed virus. Although Omicron  
303 BA.1 infection does not introduce a robust antibody response against BA.2, it still prevented  
304 BA.2 reinfection via direct contact route in this model.

305 In conclusion, our study emphasises the utility of the hamster model in studying  
306 vaccine efficacy and the potential reinfection with emerging SARS-CoV-2 variants. Our  
307 findings provide insights into the rapid surge of the Omicron variant, and this information  
308 will be important for making evidence-based public health policies.





## 310 **MATERIALS AND METHODS**

### 311 **Biosafety and ethics statement**

312 All work performed was approved by the local genetic manipulation (GM) safety  
313 committee of Imperial College London, St. Mary's Campus (centre number GM77), and the  
314 Health and Safety Executive of the United Kingdom, under reference CBA1.77.20.1. Animal  
315 research was carried out under a United Kingdom Home Office License, P48DAD9B4.

316 Collection of surplus serum samples was approved by South Central – Hampshire B  
317 REC (20/SC/0310). SARS-CoV-2 cases were diagnosed by RT-PCR of respiratory samples  
318 at St Thomas' Hospital, London.

### 319 **Cells and viruses**

320 Human embryonic kidney cells (293T; ATCC; ATCC CRL-11268) were maintained in  
321 Dulbecco's modified Eagle's medium (DMEM; Gibco), 10% fetal calf serum (FCS), 1x non-  
322 essential amino acids (NEAA; Gibco), 1x penicillin-streptomycin (P/S; Gibco). Stably  
323 transduced ACE2-expressing 293T cells were produced as previously described (32), and  
324 maintained with the addition of 1 µg/ml puromycin to growth medium. African green monkey  
325 kidney (VeroE6) cells expressing human angiotensin-converting enzyme 2 (ACE2) and  
326 transmembrane protease serine 2 precursor (TMPRSS2) (VeroE6-ACE2-TMPRSS2) were  
327 kindly provided by MRC-University of Glasgow Centre for Virus Research (CVR), Glasgow  
328 (33). The cells were maintained in DMEM, 10% FCS, 1 mg/mL Geneticin (Gibco), 0.2 mg/mL  
329 Hygromycin B (Invitrogen). All viral stocks used in this study were grown in the VeroE6-  
330 ACE2-TMPRSS2 cells.

331

| <b>Name in text</b> | <b>Virus name</b>                 | <b>PANGO lineage</b> | <b>GISAID/COG Accession</b> |
|---------------------|-----------------------------------|----------------------|-----------------------------|
| WT/D614G            | hCoV-19/England/IC19/2020         | B.1.13               | EPI_ISL_475572              |
| Alpha               | hCoV-19/England/205080610/2020    | B.1.1.7              | EPI_ISL_723001              |
| Delta               | hCoV-19/England/SHEF-10E8F3B/2021 | B.1.617.2            | EPI_ISL_1731019             |
| BA.1                | M21021166                         | BA.1                 | N/A                         |
| BA.2                | IC243335                          | BA.2                 | N/A                         |

332

### 333 **Plaque assays**

334 Nasal wash samples were serially diluted in DMEM and added to the VeroE6-ACE2-  
335 TMPRSS2 cell monolayers for 1h at 37°C. Inoculum was then removed and cells were  
336 overlaid with DEMEM containing 0.2% w/v bovine serum albumin (Gibco), 0.16% w/v  
337 NaHCO<sub>3</sub> (Gibco), 10 mM HEPES (Invitrogen), 2 mM L-Glutamine (Gibco), 1 X P/S and  
338 0.6% w/v Avicel (Gibco). Plates were incubated at 37°C, 5% CO<sub>2</sub> for 3 days. The overlay  
339 was then removed, and monolayers were stained with 0.05% crystal violet solution for 1h at  
340 room temperature. Plates were washed with tap water then dried and virus plaques were  
341 counted. The lower limit of detection of the assay was 10 plaque forming units per mL.

### 342 **SARS-CoV-2 E gene Real-time RT-PCR**

343 Virus genomes were quantified by Envelop (E) gene RT-qPCR as previously  
344 described (34). Viral RNA was extracted from supernatants of hamster nasal wash samples  
345 using the QIA Symphony DSP Virus/Pathogen Mini Kit on the QIA Symphony instrument

346 (Qiagen). Real time RT-qPCR was then performed using the AgPath RT-PCR (Life  
347 Technologies) kit on a QuantStudio™ 7 Flex Real-Time PCR System with the primers  
348 specific for SARS-CoV-2 E gene (35). For absolutely quantification of E gene RNA copies, a  
349 standard curve was generated using dilutions viral RNA of known copy number. E gene  
350 copies per ml of original virus supernatant were then calculated using this standard curve.  
351 The lower limit of detection of the E gene RT-qPCR was 1200 E copies per mL.

### 352 **Hamster transmission studies**

353 Hamster transmission studies were performed in a containment level 3 laboratory,  
354 using ISO Rat900 Individually Ventilated Cages (IVC) (Techniplast, U.K). Outbred Syrian  
355 Hamsters (4-6 weeks old), weighing 80-130 g were used. In the vaccine study, sentinel  
356 hamsters were immunized twice, four weeks apart with an saRNA vaccine encoding either  
357 SARS-CoV-2 Spike protein or a control vaccine encoding HIV gp120 protein,  
358 intramuscularly in 100 µl. Donor hamsters were intranasally inoculated with 50µl of 100 PFU  
359 of each virus while lightly anaesthetised with isoflurane. The vaccinated sentinel hamsters  
360 were introduced into the same cage as an infected donor day 1 after inoculation. Each cage  
361 thus housed one donor, one saRNA SARS-CoV-2 S vaccinee and one control saRNA HIV  
362 gp120 vaccinee animal. In the reinfection studies, sentinel hamsters were intranasally  
363 inoculated with 100 PFU of virus. Six weeks later, two pre-infected sentinel hamsters were  
364 introduced into the same cage as an infected donor day 1 post inoculation. Each cage thus  
365 housed one donor and two sentinel hamsters. Co-house continued to the end of experiments.  
366 All animals were nasal washed daily by instilling 400 µl of PBS into the nostrils, the  
367 expectorate was collected into disposable 50 ml falcon tubes. Hamsters were weighed daily  
368 post-infection.

369           The potential for hamsters infected with SARS-CoV-2 to transmit onwards was  
370 assessed using a set of equipment which detects infectious virus exhaled from infected  
371 animals as described previously (36). Airflow of 4.5 L/minute was introduced using the bias  
372 flow pump via three ports into a 10 cm (height) x 9 cm (diameter) hamster chamber (1.5  
373 L/minute into each port). Sentinel cell culture plates were placed at 3 different distances,  
374 30cm, 60cm or 90cm from the infected animal source.

### 375 **Pseudovirus neutralization assays (Imperial College London)**

376           SARS-CoV-2 spike-bearing lentiviral pseudotypes (PV) were generated as described  
377 previously (32, 37). Pseudovirus neutralization assays were performed by incubating serial  
378 dilutions of heat-inactivated human convalescent antisera with a set amount of pseudovirus.  
379 Antisera/pseudovirus mix was then incubated at 37°C for 1 h then overlaid into 96 well  
380 plates of 293T-ACE2 cells. 48 h later cells were lysed with reporter lysis buffer (Promega)  
381 and assays were read on a FLUOstar Omega plate reader (BMF Labtech) using the Luciferase  
382 Assay System (Promega).

### 383 **Neutralisation assay with SARS-CoV-2 pseudotyped virus (King's College London)**

384           Pseudotyped HIV-1 virus incorporating the SARS-CoV-2 Spike protein (either wild-  
385 type, B.1.1.7, B.1.351, B.1.617.2 or B.1.1.529, BA.2) were prepared as previously described  
386 (38, 39). Viral particles were produced in a 10 cm dish seeded the day prior with  $5 \times 10^6$   
387 HEK293T/17 cells in 10 ml of complete Dulbecco's Modified Eagle's Medium (DMEM-C,  
388 10% FBS and 1% Pen/Strep) containing 10% (vol/vol) foetal bovine serum (FBS), 100 IU/ml  
389 penicillin and 100 µg/ml streptomycin. Cells were transfected using 90 µg of PEI-Max (1  
390 mg/mL, Polysciences) with: 15µg of HIV-luciferase plasmid, 10 µg of HIV 8.91 gag/pol  
391 plasmid and 5 µg of SARS-CoV-2 spike protein plasmid.(40, 41) The supernatant was

392 harvested 72 hours post-transfection. Pseudotyped virus particles was filtered through a  
393 0.45µm filter, and stored at -80°C until required.

394 Serial dilutions of serum samples (heat inactivated at 56°C for 30mins) were prepared  
395 with DMEM media (25µL) (10% FBS and 1% Pen/Strep) and incubated with pseudotyped  
396 virus (25µL) for 1-hour at 37°C in half-area 96-well plates. Next, Hela cells stably expressing  
397 the ACE2 receptor were added (10,000 cells/25µL per well) and the plates were left for 72  
398 hours. Infection levels were assessed in lysed cells with the Bright-Glo luciferase kit  
399 (Promega), using a Victor™ X3 multilabel reader (Perkin Elmer). Each serum sample was  
400 run in duplicate and was measured against the five SARS-CoV-2 variants within the same  
401 experiment using the same dilution series.

#### 402 **Virus sequencing**

403 Delta or BA.1 variant infection were confirmed using whole genome sequencing as  
404 previously described (38) or using MT-PCR (42).

#### 405 **Statistical analysis**

406 Statistical analysis was performed using Graphpad Prism. Two-group comparisons  
407 were tested using Mann-Whitney test for unpaired groups and Wilcoxon matched-pairs  
408 signed rank test was used for paired groups. For all tests, a value of  $p < 0.05$  was considered  
409 significant.

410

411 **List of Supplementary Materials**

412 Fig. S1-S7

413

414 References

415

- 416 1. R. Viana *et al.*, Rapid epidemic expansion of the SARS-CoV-2 Omicron variant in  
417 southern Africa. *Nature* **603**, 679-686 (2022).
- 418 2. H. Tegally *et al.*, Continued Emergence and Evolution of Omicron in South Africa:  
419 New BA.4 and BA.5 lineages. *medRxiv*, 2022.2005.2001.22274406 (2022).
- 420 3. A. Netzl *et al.*, Analysis of SARS-CoV-2 Omicron Neutralization Data up to 2021-  
421 12-22. *bioRxiv*, 2021.2012.2031.474032 (2022).
- 422 4. N. Andrews *et al.*, Covid-19 Vaccine Effectiveness against the Omicron (B.1.1.529)  
423 Variant. *New England Journal of Medicine*, (2022).
- 424 5. S. Collie, J. Champion, H. Moultrie, L.-G. Bekker, G. Gray, Effectiveness of  
425 BNT162b2 Vaccine against Omicron Variant in South Africa. *New England Journal*  
426 *of Medicine* **386**, 494-496 (2021).
- 427 6. W. Dejnirattisai *et al.*, Reduced neutralisation of SARS-CoV-2 omicron B. 1.1. 529  
428 variant by post-immunisation serum. *The Lancet* **399**, 234-236 (2022).
- 429 7. S. Cele *et al.*, Omicron extensively but incompletely escapes Pfizer BNT162b2  
430 neutralization. *Nature* **602**, 654-656 (2022).
- 431 8. J. Newman *et al.*, Neutralising antibody activity against SARS-CoV-2 variants,  
432 including Omicron, in an elderly cohort vaccinated with BNT162b2. *medRxiv*,  
433 2021.2012.2023.21268293 (2021).
- 434 9. J. M. Carreño *et al.*, Activity of convalescent and vaccine serum against SARS-CoV-2  
435 Omicron. *Nature* **602**, 682-688 (2022).
- 436 10. M. Hoffmann *et al.*, The Omicron variant is highly resistant against antibody-  
437 mediated neutralization: Implications for control of the COVID-19 pandemic. *Cell*  
438 **185**, 447-456.e411 (2022).

- 439 11. E. Cameroni *et al.*, Broadly neutralizing antibodies overcome SARS-CoV-2 Omicron  
440 antigenic shift. *Nature* **602**, 664-670 (2022).
- 441 12. D. Planas *et al.*, Considerable escape of SARS-CoV-2 Omicron to antibody  
442 neutralization. *Nature* **602**, 671-675 (2022).
- 443 13. Y. Cao *et al.*, Omicron escapes the majority of existing SARS-CoV-2 neutralizing  
444 antibodies. *Nature* **602**, 657-663 (2022).
- 445 14. F. P. Lyngse *et al.*, SARS-CoV-2 Omicron VOC Transmission in Danish Households.  
446 *medRxiv*, 2021.2012.2027.21268278 (2021).
- 447 15. U. H. S. Agency, "SARS-CoV-2 variants of concern and variants under investigation  
448 in England."
- 449 16. P. F. McKay *et al.*, Self-amplifying RNA SARS-CoV-2 lipid nanoparticle vaccine  
450 candidate induces high neutralizing antibody titers in mice. *Nature Communications*  
451 **11**, 3523 (2020).
- 452 17. R. Frise *et al.*, A Self-Amplifying RNA Vaccine Protects Against SARS-CoV-2  
453 (D614G) and Alpha Variant of Concern (B. 1.1. 7) in a Transmission-Challenge  
454 Hamster Model.
- 455 18. R. Suzuki *et al.*, Attenuated fusogenicity and pathogenicity of SARS-CoV-2 Omicron  
456 variant. *Nature* **603**, 700-705 (2022).
- 457 19. P. J. Halfmann *et al.*, SARS-CoV-2 Omicron virus causes attenuated disease in mice  
458 and hamsters. *Nature* **603**, 687-692 (2022).
- 459 20. T. P. Peacock *et al.*, The altered entry pathway and antigenic distance of the SARS-  
460 CoV-2 Omicron variant map to separate domains of spike protein. *bioRxiv*,  
461 2021.2012.2031.474653 (2022).



- 462 21. D. Neeltje van *et al.*, Efficacy of ChAdOx1 vaccines against SARS-CoV-2 Variants  
463 of Concern Beta, Delta and Omicron in the Syrian hamster model. *Nature Portfolio*,  
464 (2022).
- 465 22. T. Lechmere *et al.*, Broad Neutralization of SARS-CoV-2 Variants, Including  
466 Omicron, following Breakthrough Infection with Delta in COVID-19-Vaccinated  
467 Individuals. *mBio* **0**, e03798-03721.
- 468 23. H. Chemaitelly, R. Bertollini, L. J. Abu-Raddad, Efficacy of Natural Immunity  
469 against SARS-CoV-2 Reinfection with the Beta Variant. *N Engl J Med* **385**, 2585-  
470 2586 (2021).
- 471 24. L. J. Abu-Raddad *et al.*, Introduction and expansion of the SARS-CoV-2 B.1.1.7  
472 variant and reinfections in Qatar: A nationally representative cohort study. *PLoS Med*  
473 **18**, e1003879 (2021).
- 474 25. P. Kim, S. M. Gordon, M. M. Sheehan, M. B. Rothberg, Duration of SARS-CoV-2  
475 Natural Immunity and Protection against the Delta Variant: A Retrospective Cohort  
476 Study. *Clin Infect Dis*, (2021).
- 477 26. N. Wolter *et al.*, Early assessment of the clinical severity of the SARS-CoV-2  
478 omicron variant in South Africa: a data linkage study. *Lancet* **399**, 437-446 (2022).
- 479 27. H. N. Altarawneh *et al.*, Protection against the Omicron Variant from Previous SARS-  
480 CoV-2 Infection. *N Engl J Med*, (2022).
- 481 28. P. England, SARS-CoV-2 variants of concern and variants under investigation in  
482 England. *Tech Brief* **12**, (2021).
- 483 29. U. H. S. Agency, "Risk assessment for SARS-CoV-2 variant: VUI-22JAN-01  
484 (BA.2)," (2022).
- 485 30. M. Stegger *et al.*, Occurrence and significance of Omicron BA.1 infection followed  
486 by BA.2 reinfection. *medRxiv*, 2022.2002.2019.22271112 (2022).

- 487 31. A. Z. Mykytyn *et al.*, Omicron BA.1 and BA.2 are antigenically distinct SARS-CoV-  
488 2 variants. *bioRxiv*, 2022.2002.2023.481644 (2022).
- 489 32. T. P. Peacock *et al.*, The furin cleavage site in the SARS-CoV-2 spike protein is  
490 required for transmission in ferrets. *Nat Microbiol* **6**, 899-909 (2021).
- 491 33. S. J. Rihn *et al.*, A plasmid DNA-launched SARS-CoV-2 reverse genetics system and  
492 coronavirus toolkit for COVID-19 research. *PLoS Biol* **19**, e3001091 (2021).
- 493 34. J. Zhou *et al.*, Investigating Severe Acute Respiratory Syndrome Coronavirus 2  
494 (SARS-CoV-2) Surface and Air Contamination in an Acute Healthcare Setting During  
495 the Peak of the Coronavirus Disease 2019 (COVID-19) Pandemic in London. *Clin*  
496 *Infect Dis* **73**, e1870-e1877 (2021).
- 497 35. V. M. Corman *et al.*, Detection of 2019 novel coronavirus (2019-nCoV) by real-time  
498 RT-PCR. *Euro Surveill* **25**, 2000045 (2020).
- 499 36. A. Singanayagam *et al.*, Characterising viable virus from air exhaled by H1N1  
500 influenza-infected ferrets reveals the importance of haemagglutinin stability for  
501 airborne infectivity. *PLoS Pathog* **16**, e1008362 (2020).
- 502 37. J. Zhou *et al.*, Mutations that adapt SARS-CoV-2 to mink or ferret do not increase  
503 fitness in the human airway. *Cell Rep* **38**, 110344 (2022).
- 504 38. L. Dupont *et al.*, Neutralizing antibody activity in convalescent sera from infection in  
505 humans with SARS-CoV-2 and variants of concern. *Nat Microbiol* **6**, 1433-1442  
506 (2021).
- 507 39. J. Seow *et al.*, Longitudinal observation and decline of neutralizing antibody  
508 responses in the three months following SARS-CoV-2 infection in humans. *Nat*  
509 *Microbiol* **5**, 1598-1607 (2020).
- 510 40. K. Grehan, F. Ferrara, N. Temperton, An optimised method for the production of  
511 MERS-CoV spike expressing viral pseudotypes. *MethodsX* **2**, 379-384 (2015).

- 512 41. C. P. Thompson *et al.*, Detection of neutralising antibodies to SARS-CoV-2 to  
513 determine population exposure in Scottish blood donors between March and May  
514 2020. *Euro Surveill* **25**, (2020).
- 515 42. R. Hale *et al.*, Development of a Multiplex Tandem PCR (MT-PCR) Assay for the  
516 Detection of Emerging SARS-CoV-2 Variants. *Viruses* **13**, (2021).
- 517
- 518

519 **Acknowledgements:**

520 We thank staff at Imperial College Central Biological Services for their expert help. We  
521 thank Dr Matthew Turnbull and Dr Suzannah Rihn of the MRC-University of Glasgow  
522 Centre for Virus Research (CVR) for sharing their Vero E6-ACE2-TMPRSS2 cells and  
523 Gavin Screaton, Wanwisa Dejnirattisai and Alison Cowper from Oxford University for  
524 sharing the BA.1 isolate. For the Alpha, Delta and Omicron swabs, we thank Thushan de  
525 Silva at University of Sheffield, the ISARIC4C consortium and Paul Randell, Marcus Pond  
526 and colleagues at NWLP and PHE, Michael Crone and Graham Taylor of Imperial College  
527 London.

528 **Funding:**

529 This work was supported by the G2P-UK National Virology Consortium funded by the MRC  
530 (MR/W005611/1).

531 RK was supported by Wellcome fellowship no. 216353/Z/19/Z.

532

**Fig. 1**

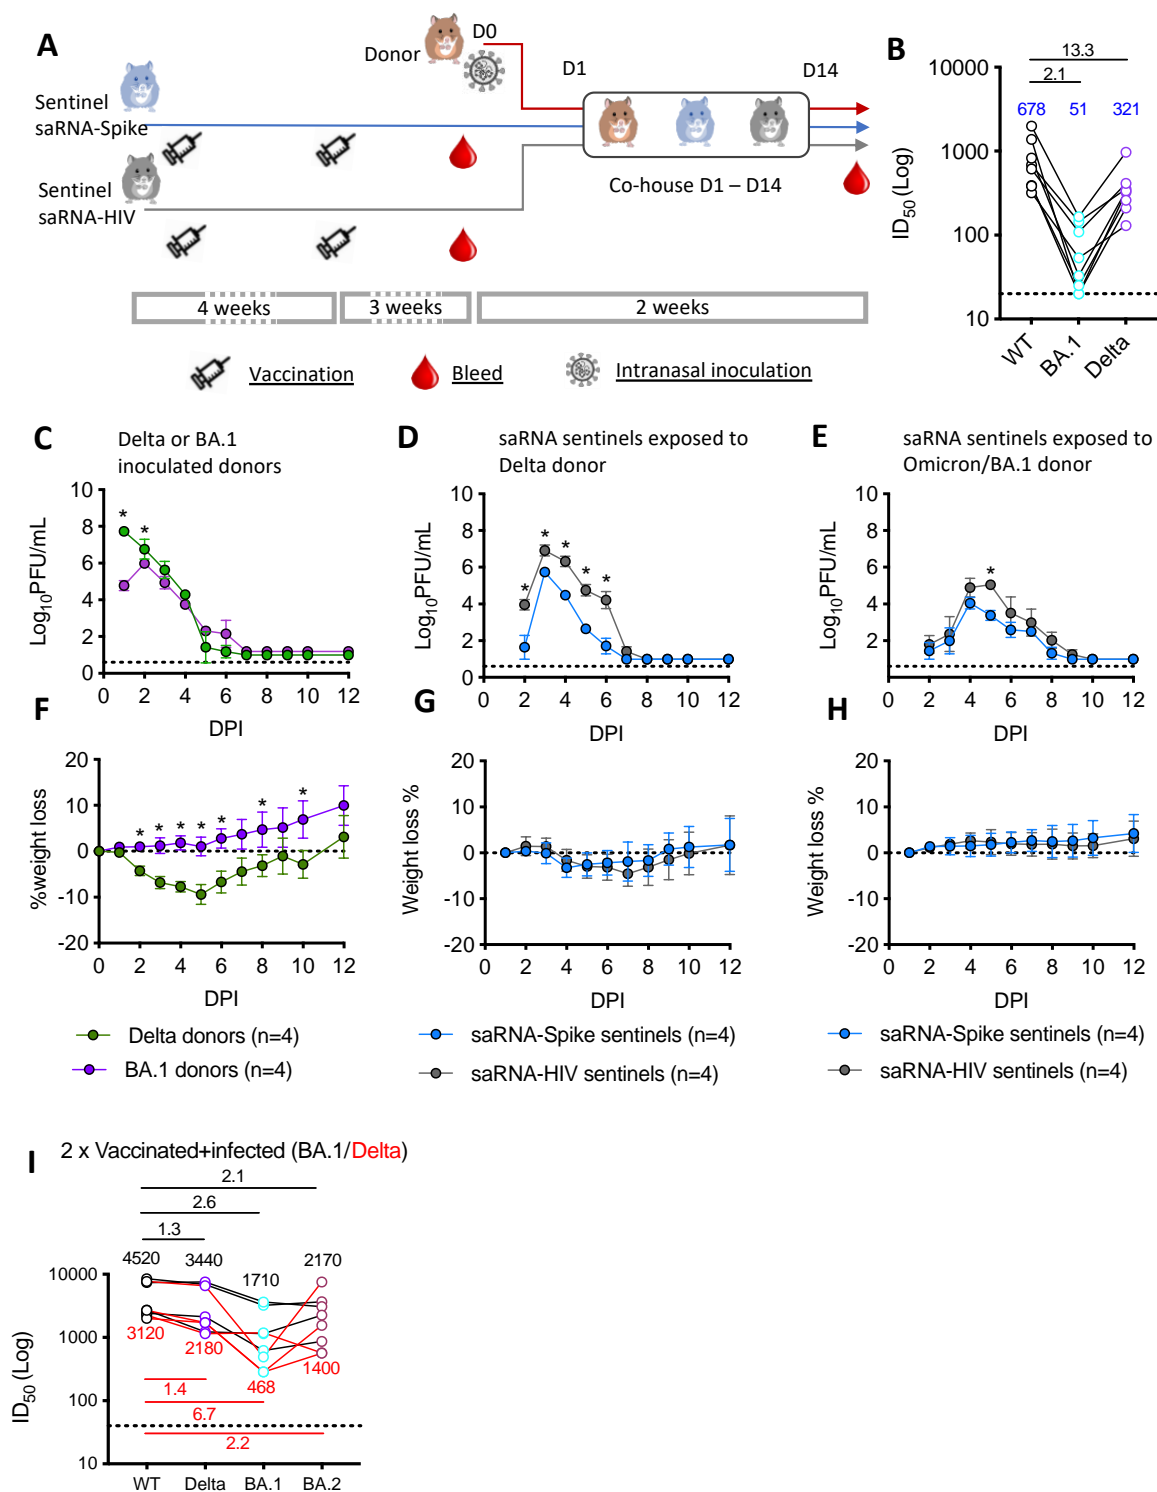

533

534 **Figure 1. Omicron/BA.1 variant infection of hamsters vaccinated with a Wuhan-like**  
 535 **Spike self-amplified RNA vaccine.**

536

Fig. 2

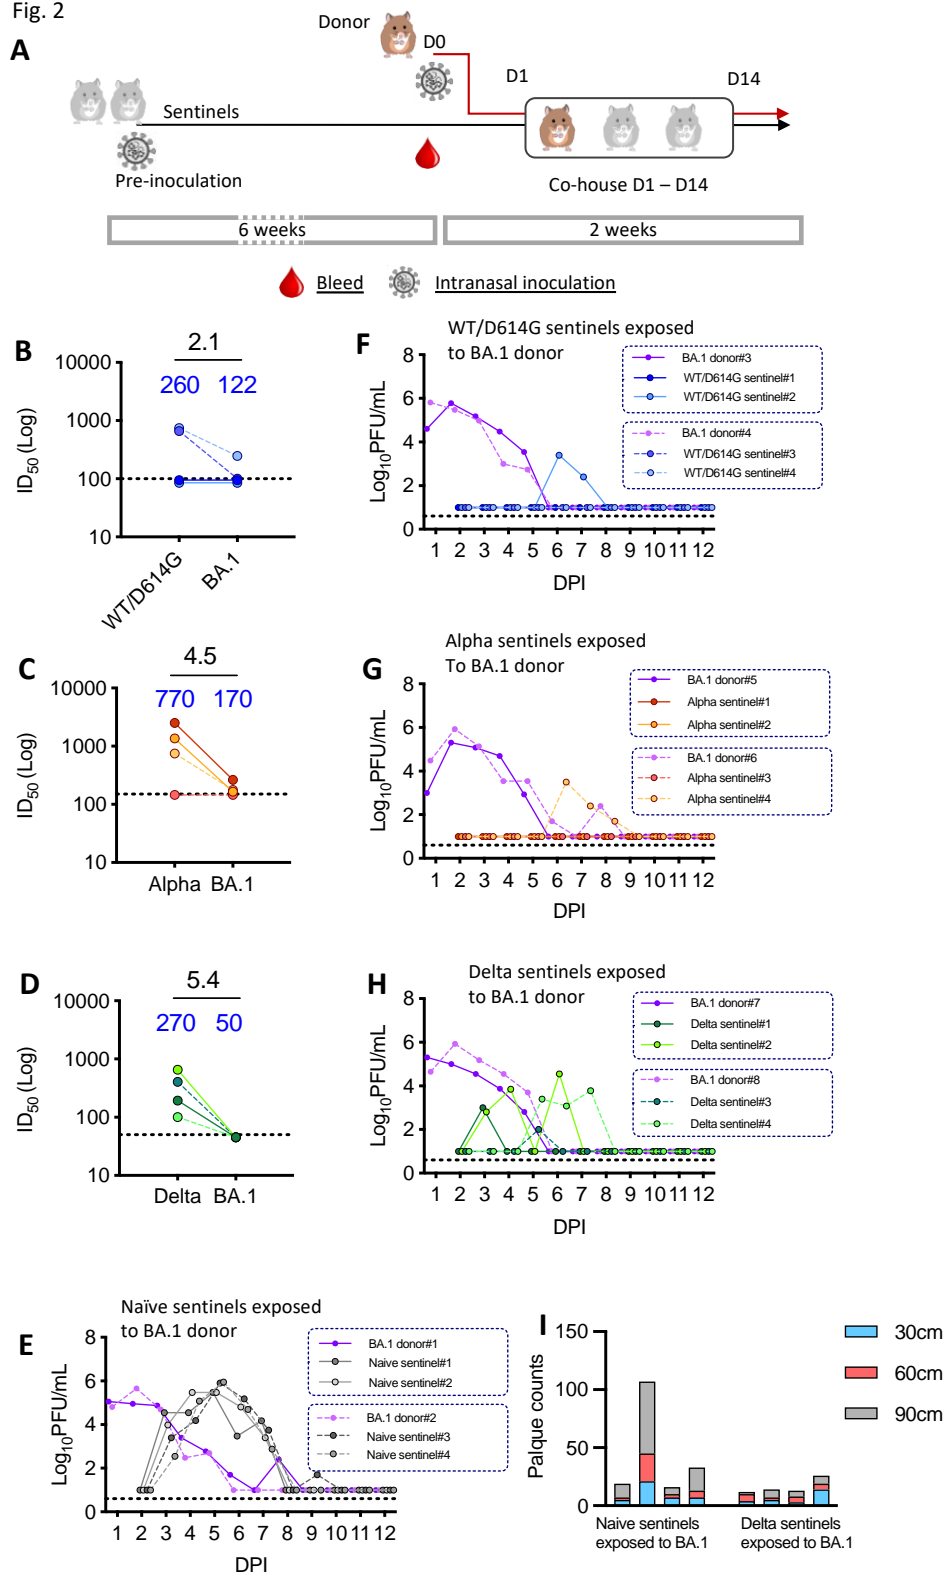

537

538 **Figure 2. Reinfection of hamsters infected with earlier variants following exposure to**  
539 **Omicron/BA.1.**

540

Fig. 3

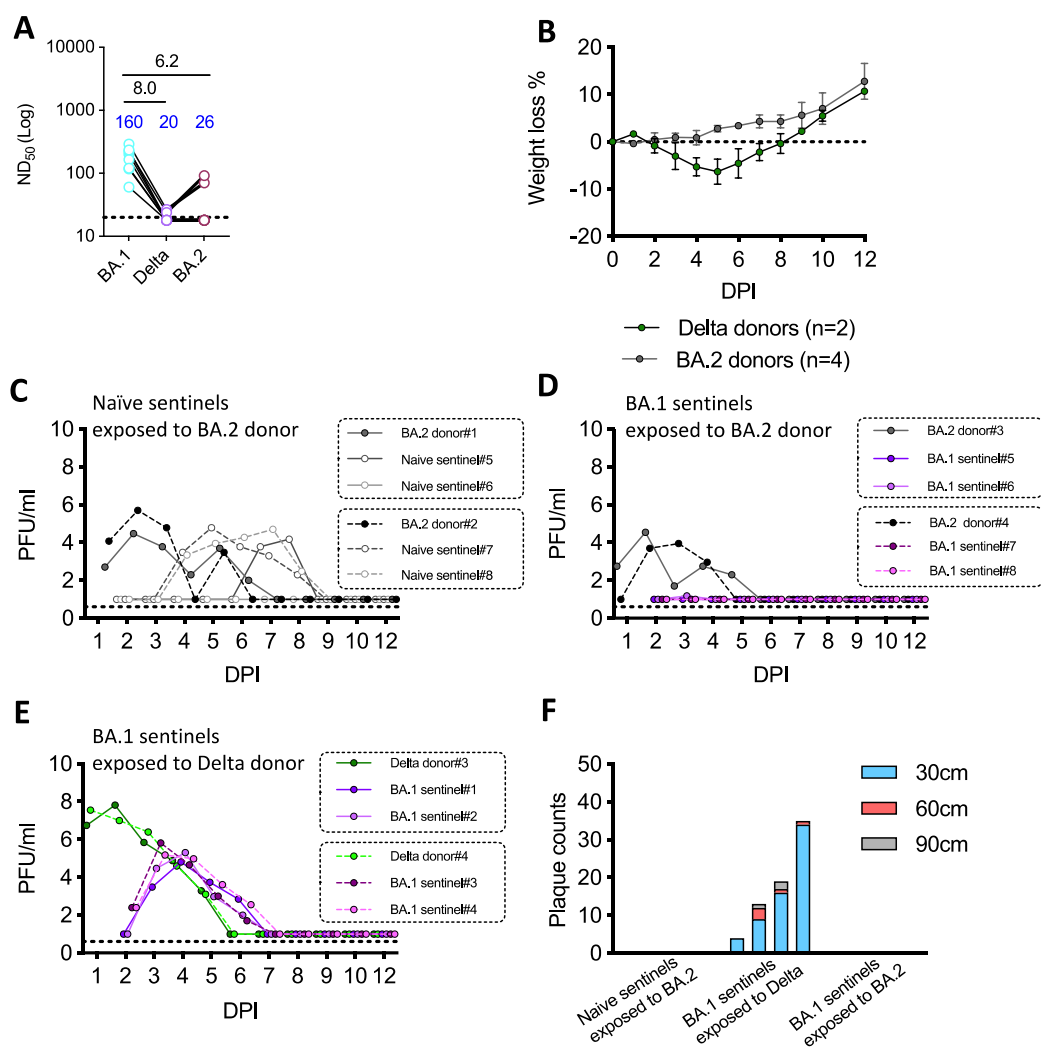

541

542 **Figure 3. Reinfection of hamsters previously infected by Omicron/BA.1 with Delta**  
543 **variant but not Omicron/BA.2.**

544

Fig. 4 **A**

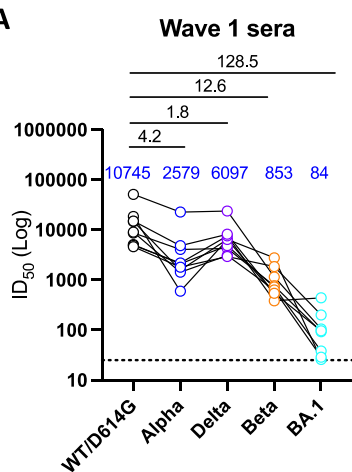

**B**

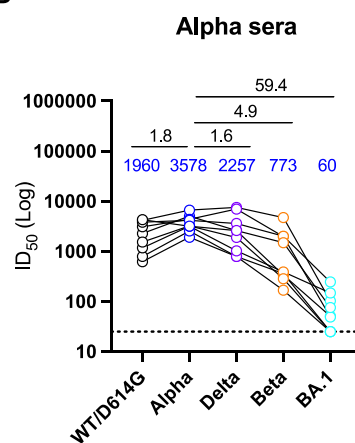

**C**

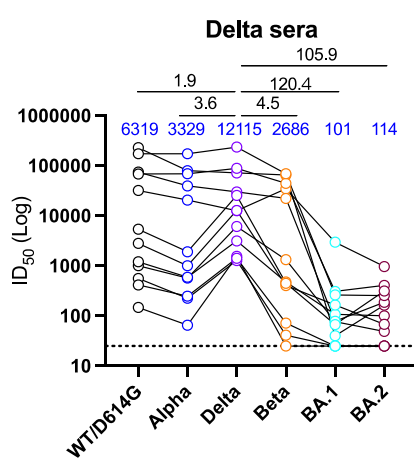

**D**

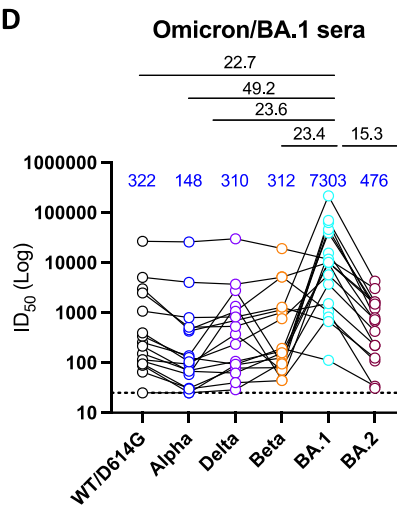

**E**

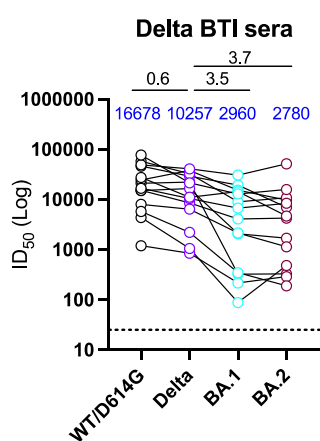

**F**

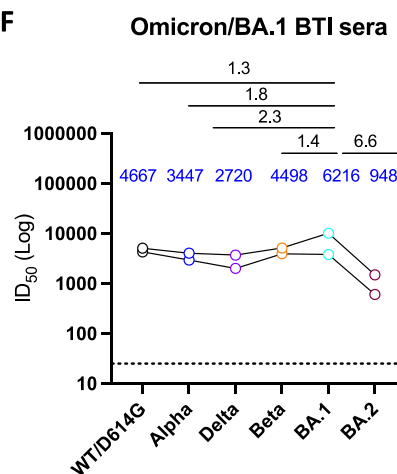

545

546 **Figure 4. Human convalescent sera**

547



548 **Author contributions:**

549 W.S.B., T.P.P., J.Z., K.J.D., and R.J.S. conceptualized the studies; J.Z., K.S., P.F.M., and  
550 M.M. performed the hamster experiments and analyzed the data; T.P.P., A.K., Y.Y., T.L.,  
551 L.B.S., and K.J.D. performed the neutralization assays and virus sequencing; J.C.B., J.Z., and  
552 M.M. cultured the variants of SARS-CoV-2; W.S.B., J.Z., T.P.P., K.J.D. and K.S. drafted the  
553 manuscript, all authors had the opportunity to provide feedback for the final manuscript.

554 **Competing interests:**

555 Robin Shattock and Paul McKay and are co-inventors on a patent application covering this  
556 SARS-CoV-2 self-amplifying RNA vaccine. All other authors have nothing to declare.

557 **Data and materials availability:**

558 All data are available in the main text or the supplementary materials.

559

560 **Figures**

561 **Fig. 1. Omicron/BA.1 variant infection of hamsters vaccinated with a Wuhan-like Spike**  
562 **self-amplified RNA vaccine.**

563 (A) Experimental design. Two groups of 8 hamsters each were vaccinated with self-amplified  
564 RNA (saRNA) Spike (n=8) or the saRNA-HIV vaccine (n=8). The vaccination schedule was  
565 a priming dose followed 4 weeks later by a boost. Three weeks after the second dose of  
566 vaccine, the vaccinated hamsters were co-housed with donor hamsters which had been  
567 inoculated intranasally with 100 PFU Delta or BA.1 variant the previous day. Each cage thus  
568 housed one donor, one saRNA-Spike vaccinee and one control saRNA-HIV vaccinee  
569 hamster. (B) Pseudovirus neutralisation assays using sentinel hamster sera collected two  
570 weeks after the second vaccine dose. Fold changes (black numbers) in geometric means (blue  
571 numbers) are shown above the symbols. (C-E), Infectious virus shed in nasal wash of donor  
572 hamsters (C), of saRNA sentinels exposed to Delta donors (D), and of saRNA sentinels  
573 exposed to the BA.1 donors (E). Nasal wash samples were collected daily and infectious  
574 virus titers assessed by plaque assay in Vero cells expressing ACE2 and TMPRSS2 (VAT).  
575 Lowest detection limit is 10 PFU/mL. The symbols represent mean and S.D. (F-H), Body  
576 weight change was monitored daily. Symbols represent mean and S.D. (I) Pseudovirus  
577 neutralisation assays using sentinel hamster sera collected at the end of experiment, 14 days  
578 after exposure. Fold changes in geometric means from the vaccinated sentinels infected with  
579 BA.1 (black numbers) or Delta (red numbers) are shown. Statistically significant differences  
580 (C-H) were determined using Mann-Whitney test. \*  $p < 0.05$ , \*\*\*  $p < 0.001$ .

581 **Fig. 2. Reinfection of hamsters infected with earlier variants following exposure to**  
582 **Omicron/BA.1.**

583 (A) Experimental design. Three groups of 4 hamsters each were inoculated intranasally with  
584 100 PFU of WT/D614G, Alpha or Delta variants. Six weeks later, two previously infected  
585 hamsters were co-housed with a donor hamster inoculated with 100 PFU BA.1 from 1 day  
586 post inoculation. Age-matched naïve sentinels were exposed to the BA.1 donors as controls.  
587 Each cage thus had one donor and two sentinels. (B-D) Pseudovirus neutralisation assays  
588 against homologous strain and BA.1 using sera collected from previously WT/D614G  
589 infected hamsters (B), Alpha infected hamsters (C) and Delta infected hamsters (D). Fold  
590 changes (black numbers) in geometric means (blue numbers) are shown above the symbols.  
591 (E-H), Virus shedding profiles of BA.1 infected donors and naïve sentinel hamsters (E),  
592 BA.1 infected donors and sentinel hamsters previously infected with WT/D614G (F), BA.1  
593 infected donors and sentinel hamsters previously infected with Alpha (G), and BA.1 infected  
594 donors and sentinel hamsters previously infected with Delta (H). Nasal wash samples were  
595 collected daily and assessed by the plaque assay. The lower detection limit is 10 PFU/mL. (I)  
596 Potential for onwards transmission of BA.1 determined by measuring infectious virus  
597 deposited from air at 30cm, 60cm and 90cm from the infected naïve and previously Delta  
598 infected sentinels.

599 **Fig. 3. Reinfection of hamsters previously infected by Omicron/BA.1 with Delta variant**  
600 **but not Omicron/BA.2.**

601 Eight hamsters were inoculated intranasally with 100 PFU of the BA.1 variant. Six weeks  
602 later two previously infected hamsters were co-housed with a donor hamster inoculated with  
603 100 PFU of the Delta or BA.2 variant from 1 day post inoculation. Age-matched naïve  
604 sentinels were exposed to BA.2 donors as controls. (A) virus shedding in nasal wash samples  
605 of the naïve sentinels and the BA.2 donors. (B) Potential for onwards transmission by  
606 measuring infectious virus deposited at 30cm, 60cm and 90cm from the naïve hamsters  
607 infected with Omicron/BA.2 and the pre-BA.1 hamsters reinfected with BA.2 or Delta. (C)

608 Pseudovirus neutralisation assays against homologous strain BA.1, Delta and BA.2 using the  
609 sera collected from pre-BA.1 infected hamsters. Fold changes (black numbers) in geometric  
610 means (blue numbers) are shown above the symbols. **(D)** Virus shedding profile of the Delta  
611 donors and pre-BA.1 inoculated sentinels. **(E)** virus shedding profile of the BA.2 donors and  
612 pre- BA.1 inoculated sentinels. Nasal wash samples were collected daily and assessed by  
613 plaque assay. The lower detection limit of plaque assay is 10 PFU/mL.

614 **Figure 4. Human convalescent sera**

615 Differences in cross neutralising activity against the variants of concern from the  
616 convalescent sera of the individual previously infected with WT/D614G (A), Alpha (B),  
617 Delta (C) or BA.1 (D), or vaccinated individuals infected with Delta (E) or BA.1 (F).  
618 ID<sub>50</sub> was measured using HIV-1-based virus particles (PVs), pseudotyped with the S  
619 glycoprotein of SARS-CoV-2. Each line represents one individual. The cut-off (dot lines) for  
620 the pseudovirus neutralisation assay is 1:50. Fold changes (black numbers) in geometric  
621 means (blue numbers) are shown above.

622

623 **Table 1. Omicron breakthrough infections in previously vaccinated or infected hamsters**

624

625

Fig. S1

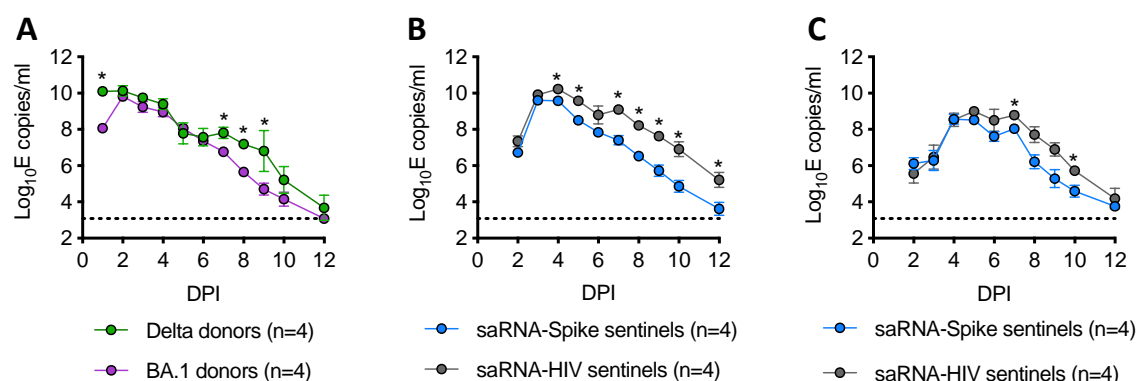

626

627 **Fig. S1. Virus shedding profile of the donor and self-amplifying RNA vaccine (saRNA)**

628 **sentinel hamsters. (A)** Virus shedding profile of donor hamsters inoculated with 100 PFU

629 Delta or BA.1. **(B)** Virus shedding profile of saRNA sentinels exposed to the delta donors.

630 **(C)** Virus shedding profile of saRNA sentinels exposed to the BA.1 donors. Nasal wash

631 samples were collected daily and assessed by real-time RT-PCR targeting Envelop gene of

632 SARS-CoV-2. The lower detection limit is 1200 E copies/mL. Statistically significant

633 differences were determined using Mann-Whitney test. \*  $p < 0.05$ .

634

Fig. S2

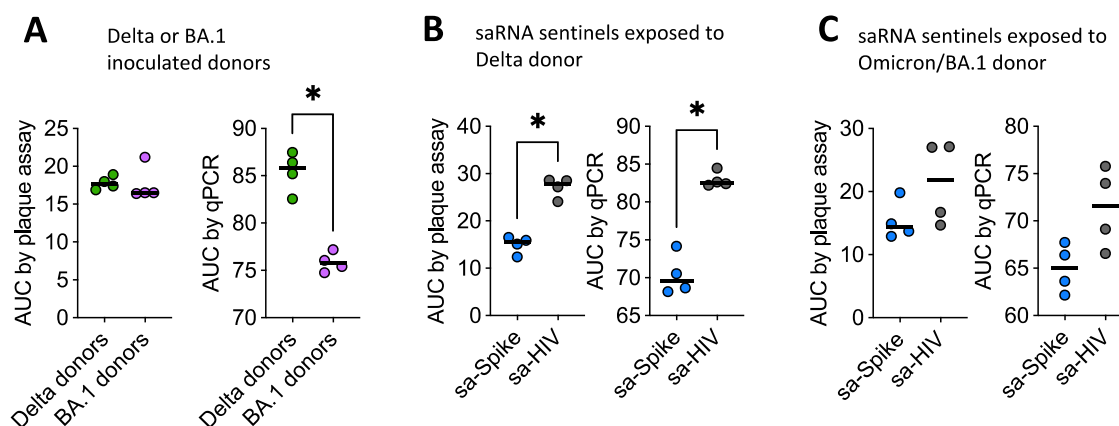

635

636 **Fig. S2. Total virus shedding of the donor and self-amplifying RNA vaccine (saRNA)**

637 **sentinel hamsters. (A)** Area under the curve (AUC) of donor hamsters inoculated with 100

638 PFU Delta or BA.1 was determined by plaque assay or real-time RT-PCR. **(B)** AUC of

639 saRNA sentinels exposed to the delta donors. **(C)** AUC of saRNA sentinels exposed to the

640 Omicron/BA.1 donors. Statistically significant differences were determined using Mann-

641 Whitney test. \*  $p < 0.05$ .

642

Fig. S3

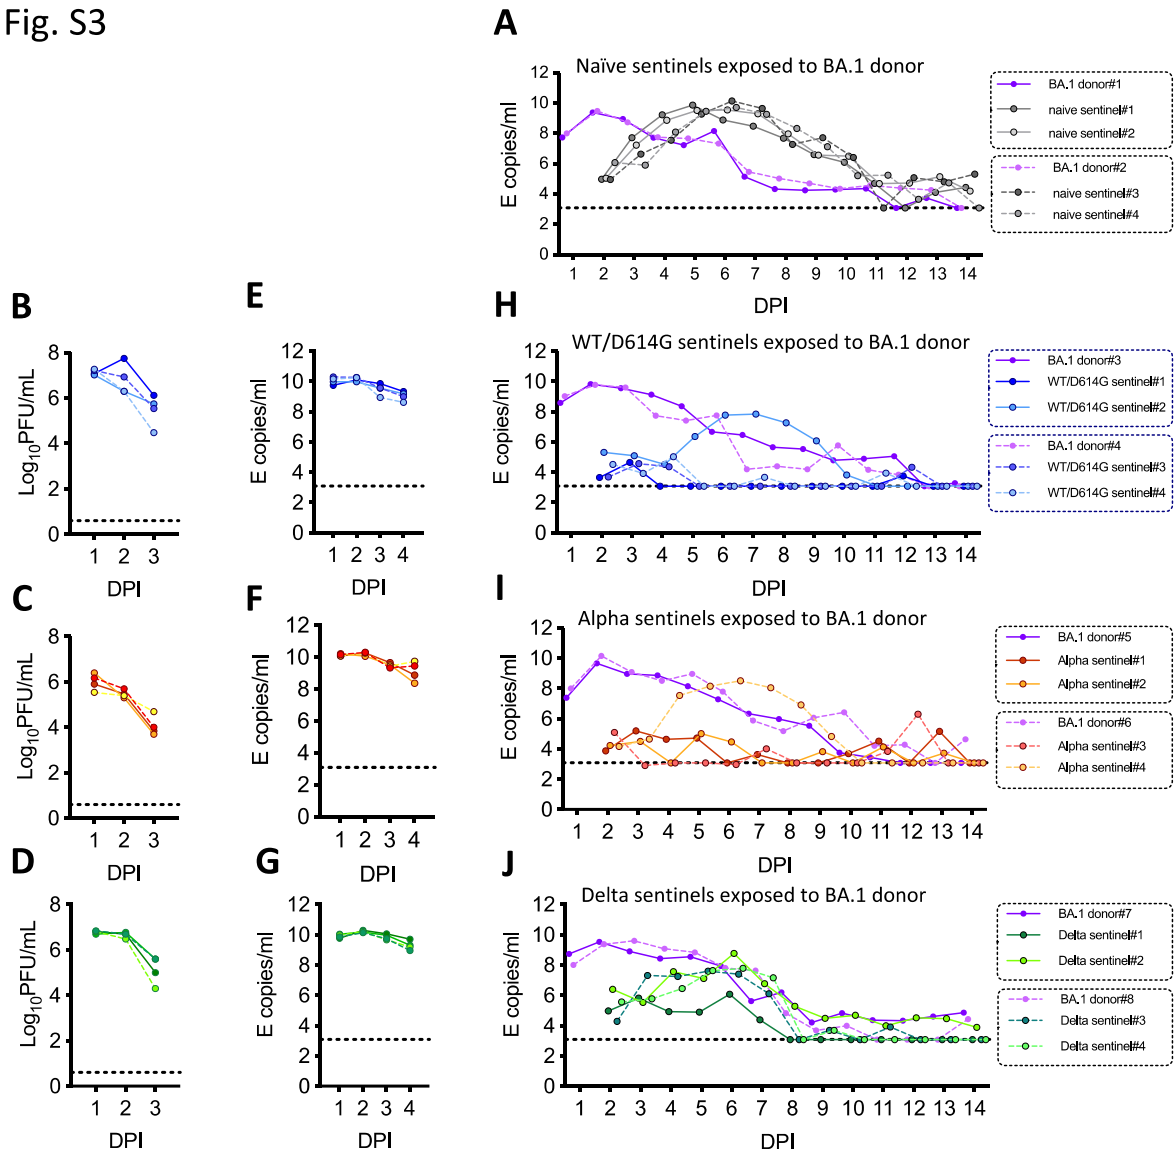

643

644 **Fig. S3 Virus shedding profile of donor and sentinel hamsters following exposure after**  
645 **previous infection.**

646 (A) Virus shedding profile of BA.1 inoculated donors and naïve sentinel hamsters. (B-G),  
647 Hamsters were previously infected with 100 PFU WT/D614G, Alpha or Delta variants. Virus  
648 shedding profiles determined by plaque assays (B-D) or real-time PCR (E-G) from 1 to 3  
649 days post inoculation are shown. (H-J) Virus shedding profile of previously infected sentinel  
650 hamsters exposed to Omicron/BA.1 donors. Nasal wash samples were collected daily and

651 assessed by real-time RT-PCR targeting E gene of SARS-CoV-2. The lower detection limit is

652 1200 E gene copies/mL.

653



Fig. S4

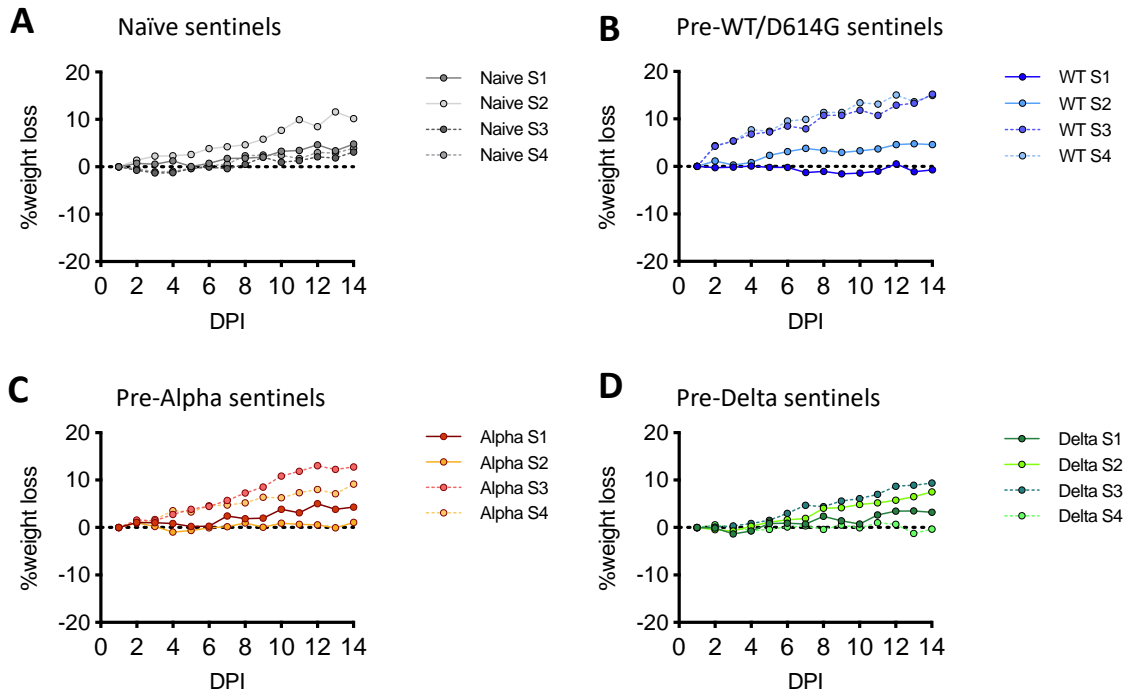

654

655 **Fig. S4. Weight loss change of the sentinel hamsters exposed to Omicron/BA.1 donors.**

656 **(A)** Weight loss change of naïve sentinel hamsters exposed to the BA.1 donors. **(B)** Weight

657 loss change of pre-WT/D614G sentinel hamsters exposed to the BA.1 donors. **(C)** Weight

658 loss change of pre-Alpha sentinel hamsters exposed to the BA.1 donors. **(D)** Weight loss

659 change of pre-Delta sentinel hamsters exposed to the BA.1 donors

660

Fig. S5

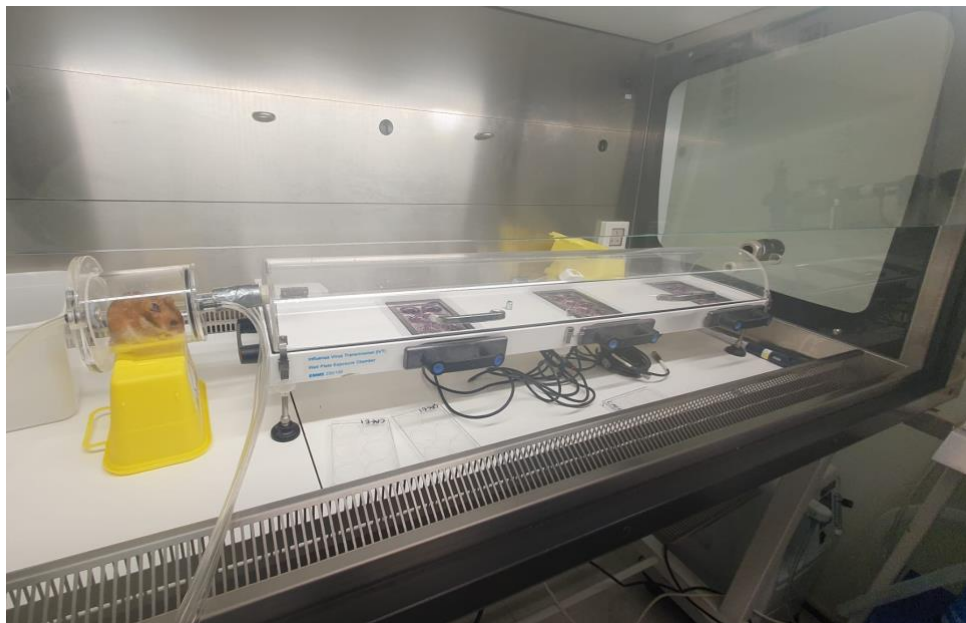

661

662 **Fig. S5. Assessing infectious virus exhaled from infected hamster.** Airflow is generated  
663 using a bias flow pump, which connects to a hamster chamber (10cm x 9cm, long x  
664 diameter). The chamber is connected to a half cylindrical clear acrylic 100cm (length) x  
665 18cm (width) x 9cm (height) exposure tunnel containing cell culture plates situated 30cm,  
666 60cm and 90cm from the animal.

667

Fig. S6

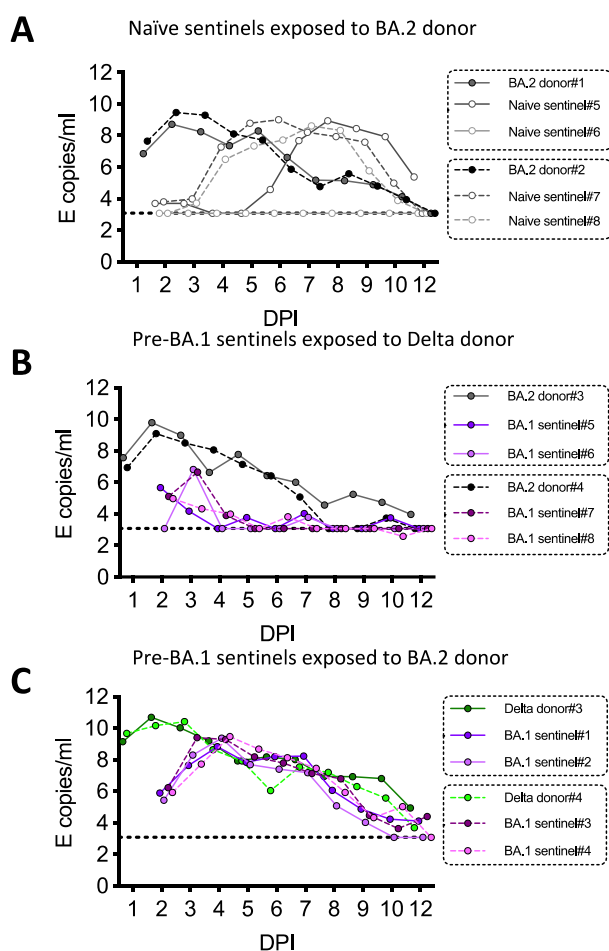

668

669 **Fig. S6. Virus shedding profile of the donor and sentinel hamsters. (A)** Virus shedding  
670 profile of naïve sentinel hamsters exposed to the BA.2 inoculated donors. **(B)** Virus shedding  
671 profile of pre-BA.1 sentinel hamsters exposed to BA.2 donors. **(C)** Virus shedding profile of  
672 pre-BA.1 sentinel hamsters exposed to Delta donors. Nasal wash samples were collected  
673 daily and assessed by real-time RT-PCR targeting Envelop gene of SARS-CoV-2. The lower  
674 detection limit is 1200 E copies/mL.

675

676

Fig. S7

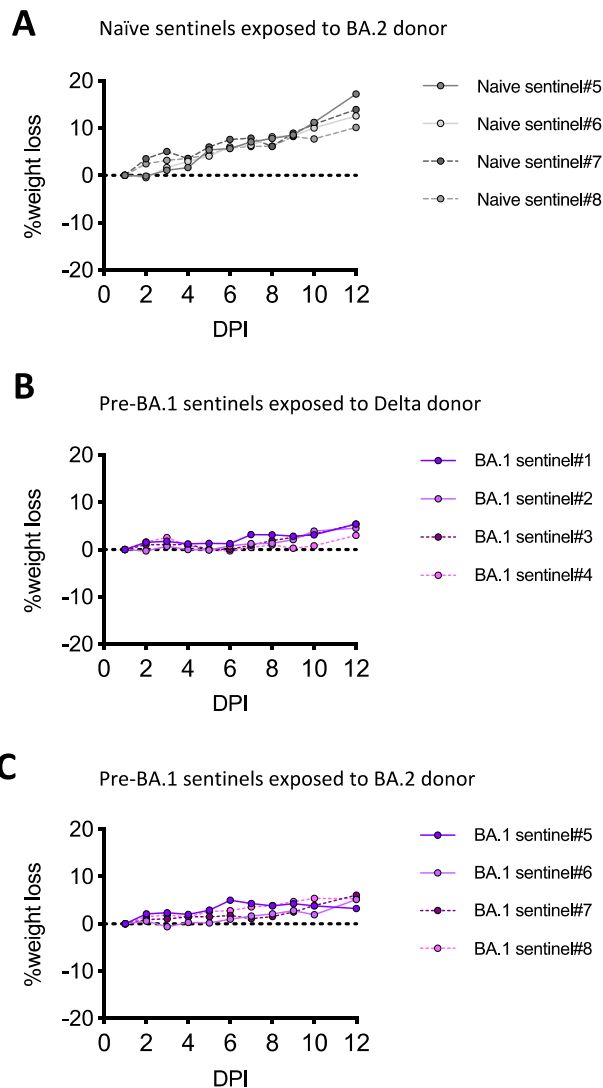

677

678 **Fig. S7. Weight loss change of hamsters infected by Omicron/BA.2 and previously**  
679 **infected sentinel hamsters exposed to Delta or Omicron/BA.2 virus. (A) Weight loss of**  
680 **naïve sentinel hamsters exposed to BA.2 donors. (B) Weight loss of pre-BA.1 sentinel**  
681 **hamsters exposed to the Delta donors. (C) Weight loss change of pre-BA.1 sentinel hamsters**  
682 **exposed to the BA.2 donors.**

683

684
